# Supplementary material for: Attitudes of Healthcare Workers toward Influenza Vaccination in the COVID-19 Era
Source: MDPI journal article supplement (doi:10.3390/vaccines10060883), 2022-05-31
Supplement: s1 [file s1]

**Table S1. Sample characteristics of the whole sample of respondents to the questionnaire and in accordance with adherence to the vaccination in 2020.**

|                                   | <b>Total<br/>N=324</b> | <b>Did you get vaccinated during 2020<br/>flu season? *</b> |                     |          |
|-----------------------------------|------------------------|-------------------------------------------------------------|---------------------|----------|
|                                   |                        | <b>Yes<br/>n=103</b>                                        | <b>No<br/>n=218</b> | <b>P</b> |
| <b>Age (mean, SD)</b>             | 48.1, 9.4              | 47.8, 9.9                                                   | 48.1, 9.2           | 0.780    |
| <b>Years of employment, n (%)</b> |                        |                                                             |                     | 0.188    |
| ≤5 years                          | 31 (9.6)               | 8 (7.7)                                                     | 23 (10.6)           |          |
| 6-10 years                        | 29 (9)                 | 13 (12.6)                                                   | 15 (6.9)            |          |
| >10 years                         | 261 (80.9)             | 81 (78.6)                                                   | 180 (82.6)          |          |
| Not declared                      | 2 (0.6)                | -                                                           | -                   |          |
| <b>Gender<sup>§</sup>, n (%)</b>  |                        |                                                             |                     | 0.093    |
| Male                              | 65 (20.1)              | 26 (25.2)                                                   | 38 (17.4)           |          |
| Female                            | 258 (79.6)             | 76 (74.5)                                                   | 180 (82.6)          |          |
| Not declared                      | 1 (0.3)                | -                                                           | -                   |          |
| <b>Professional role, n (%)</b>   |                        |                                                             |                     | 0.001    |
| Nurse                             | 133 (41.3)             | 30 (29.1)                                                   | 101 (46.3)          |          |
| Physician                         | 99 (30.6)              | 48 (46.6)                                                   | 51 (23.4)           |          |
| Others <sup>¥</sup>               | 25 (7.8)               | 9 (8.7)                                                     | 15 (6.9)            |          |
| Health care professional          | 23 (7.1)               | 7 (6.8)                                                     | 15 (6.9)            |          |
| Technician                        | 22 (6.8)               | 5 (4.8)                                                     | 17 (7.8)            |          |
| Nurse coordinator                 | 20 (6.2)               | 4 (3.9)                                                     | 16 (7.4)            |          |
| Not declared                      | 2 (0.5)                | -                                                           | -                   |          |
| <b>Marital status, n (%)</b>      |                        |                                                             |                     | 0.535    |
| Married                           | 218 (67.3)             | 69 (67)                                                     | 147 (67.4)          |          |
| Single                            | 72 (22.2)              | 23 (22.3)                                                   | 48 (22.1)           |          |
| Divorced                          | 30 (9.3)               | 11 (10.7)                                                   | 19 (8.7)            |          |
| Widow                             | 4 (1.2)                | 0                                                           | 4 (1.8)             |          |
| <b>Setting, n (%)</b>             |                        |                                                             |                     | 0.042    |
| ED/ICU                            | 62 (19.1)              | 18 (17.5)                                                   | 44 (20.2)           |          |
| Medical ward                      | 102 (31.5)             | 39 (37.8)                                                   | 61 (28)             |          |
| Surgical ward                     | 37 (11.4)              | 7 (6.8)                                                     | 30 (13.8)           |          |
| Ambulatory care                   | 83 (25.6)              | 30 (29.1)                                                   | 53 (24.3)           |          |
| Non-clinical setting <sup>¥</sup> | 23 (7.1)               | 3 (2.9)                                                     | 20 (9.2)            |          |
| Not declared                      | 17 (5.2)               | -                                                           | -                   |          |

<sup>¥</sup>administrative, labs

<sup>§</sup>two workers did not respond

\*Three subjects did not respond about flu vaccination in 2020

ED/ICU=Emergency Department/Intensive Care Unit

**Table S2. Factors associated with the refusal of flu vaccination in 2020**

|                                              | <b>p</b>     | <b>Odds Ratio</b> | <b>95% C.I.</b> |              |
|----------------------------------------------|--------------|-------------------|-----------------|--------------|
| <b>Gender (reference: female)</b>            | 0.201        | 0.647             | 0.332           |              |
| <b>Years of work (reference &lt;5 years)</b> | 0.196        |                   |                 |              |
| 6-10                                         | 0.079        | 0.310             | 0.084           | 10.145       |
| >10                                          | 0.125        | 0.376             | 0.107           | 10.314       |
| <b>Age</b>                                   | 0.379        | 10.017            | 0.979           | 10.056       |
| <b>Role (reference: nurse coordinator)</b>   | 0.003        |                   |                 |              |
| Nurse                                        | 0.954        | 1.037             | 0.304           | 30.531       |
| Physician                                    | <b>0.033</b> | <b>0.254</b>      | <b>0.072</b>    | <b>0.893</b> |
| Health care professionals                    | 0.253        | 0.419             | 0.094           | 10.861       |
| Technicians                                  | 0.895        | 1.111             | 0.231           | 50.341       |
| Others                                       | 0.580        | 0.660             | 0.152           | 20.867       |
| <b>Setting (reference ED/ICU)</b>            | 0.017        |                   |                 |              |
| Medical ward                                 | <b>0.007</b> | <b>0.333</b>      | <b>0.149</b>    | <b>0.745</b> |
| Surgical ward                                | 0.625        | 0.756             | 0.246           | 2.322        |
| Ambulatory                                   | <b>0.016</b> | <b>0.336</b>      | <b>0.138</b>    | <b>0.818</b> |
| Non-clinical setting                         | 0.864        | 1.139             | 0.255           | 5.083        |

ED/ICU=Emergency Department/Intensive Care Unit
